# Supplementary material for: Cancer Vaccines Co-Targeting HER2/Neu and IGF1R
Source: PubMed Central journal article supplement (PMC6520928; doi:10.3390/cancers11040517), 2019-04-11
Supplement: cancers-11-00517-s001.pdf [file cancers-11-00517-s001.pdf]

Supplementary Materials:

## Cancer Vaccines Co-Targeting HER2/Neu and IGF1R

Carla De Giovanni, Lorena Landuzzi, Arianna Palladini, Marianna Lucia Ianzano, Giordano Nicoletti, Francesca Ruzzi, Augusto Amici, Stefania Croci, Patrizia Nanni and Pier-Luigi Lollini

### Optimized sequence of the murine IGF1R gene

Optimized Sequence: Length: 4316, GC%: 50.65, Minimum Free Energy: 1519.80

AGTGAGGACTGAGTTGGAGACTTTTTTTTTCTTTTTTCTTTTTCTTTTTTTTTTTTTTTTTCTAT  
TTTTGAGAAAAGGGAATTCGTCCCAAATAAAAGGAGCCACCATGAAGAGTGGAAAGTGGTG  
GAGGTAGCCCTACCAGTCTCTGGGGGCTGGTGTTCGTGTCAGCCGCTCTCAGCCTTTGGCCCA  
CCTCCGGGGAGATCTGTGGCCCCGGAATCGATATCAGAAACGATTACCAGCAGCTGAAAAG  
ACTGAAAATTGCACCGTCATTGAGGGCTTCTGCACATCCTGCTGATTTCCAAAGCTGAAG  
ACTATAGGTCATATAGGTTCCCTAAACTGACCGTGATAACAGAGTATCTGCTTCTGTTTCGCG  
TGGCCGGCCTGGAATCCCTGGGCGATCTGTTTCTAATCTCACAGTGATCAGAGGCTGGAAG  
CTGTTCTACAACACTACGCTCTGGTTATTTTCGAAATGACTAACCTGAAGGACATAGGGCTCTAC  
AACCTCAGGAACATCACCCGGGGCGCTATTTCGGATCGAGAAAATGCAGATCTGTGCTATCT  
GTCTACCATTGATTGGTCACTGATTCTGGATGCTGTCTCTAATAATTACATCGTGGGAATAA  
GCCCCCTAAAGAATGCGGGGACCTTTGTCCTGGCACACTCGAGGAGAAACCAATGTGTGAA  
AAGACGACCATTAACAATGAGTATAACTATCGCTGTTGGACTACAAATAGATGCCAGAAGA  
TGTGCCCTTCTGTGTGTGGGAAGCGCGCATGTACCGAAAATAATGAGTGTGTACCCCGAA  
TGTCTTGGGTCTGTACACACCTGACGACAATACTACCTGTGTGCGCTGTAGGCATTATTAT  
TATAAAGGAGTTTGTGTTCCAGCCTGCCCCCAGGGACTTATCGCTTTGAAGGCTGGCGGTGC  
GTGGACAGAGACTTTTTCGCTAACATTCCAAACGCCGAGTCCAGTGACTCCGATGGTTTCGT  
CATTGATGACGATGAATGTATGCAGGAATGCCCTAGCGGGTTTATACGGAACCTCTACCCAGT  
CTATGTACTGTATTCCATGTGAAGGACCCTGTCCCAAAGTTTGTGGGGATGAAGAGAAGAAG  
ACAAAGACCATTGACAGCGTGACCTCAGCCCAGATGTTGCAGGGATGTACGATTCTGAAGG  
GAAATCTCCTCATCAACATTAGAAGGGGGAATAATATCGCAAGTGAAGTGGAAAACCTTTAT  
GGGACTGATAGAGGTCGTGACCGGGTATGTGAAGATTCGGCATAGCCACGCCCTTGTCTCTC  
TCAGCTTTCTCAAAAATCTGAGACTGATCCTGGGCGAGGAACAGCTTGAAGGTAACACTCTCC  
TTTTACGTCCTCGACAACCAGAATCTGCAACAGCTGTGGGACTGGAACCACCGTAACCTCAC  
CGTGCGATCCGGAAAAATGTATTTTGCATTCAATCCAAAGCTGTGCGTTTCCGAGATCTACCG  
GATGGAAGAGGTCACGGGAACGAAGGGGAAGACAGTCAAAAGGAGATATCAACACTAGGA  
ATAATGGAGAGCGGGCTTCCTGCGAAAGTGACGTGCTCAGATTCACCTCCACCACCACTGG  
AAAAATCGAATTATCATTACGTGGCACCGTTATCGACCCCCTGATTATAGAGACCTGATCAG  
TTTACCCGTGTAACAAGGAGGCTCCCTTTAAAAACGTTACAGAATACGACGGTCAGGATG  
CCTGCGGATCCAATTCATGGAATATGGTGGACGTGGATCTGCCTCCAAACAAAGAAGGGGA  
GCCAGGCATTCTTCTCACGGCCTCAAACCGTGGACCCAGTATGCCGTCTATGTGAAGGCTGT  
GACCCTGACAATGGTCGAGAATGATCACATCCGGGGAGCCAAGTCTGAAATTCTGTACATTA  
GAACTAACGCTAGTGTCCCTAGTATCCCTCTCGACGTGCTGTCAGCCTCAACTCTTCCAGCC  
AGCTGATCGTCAAATGGAACCCCCGACTCTTCCGAACGGGAATCTGTCTATTACATCGTG  
CGCTGGCAGAGGCAACCACAGGATGGGTATCTGTACCGGCACAACCTATTGTAGTAAGGATA  
AAATTCCAATTAGGAAGTATGCAGATGGGACCATTGACGTGGAGGAGGTTACTGAGAACCC  
CAAGACAGAGGTTTGTGGAGGGGATAAGGGACCGTGTGTGCCTGCCCAAGACAGAGGCC  
GAAAAACAGGCCGAAAAGGAGGAAGCTGAGTATCGCAAGTCTTCGAGAACTTCTTCATA  
ACTCTATCTTTGTCCCAGGCCTGAACGTAGACGGAGAGATGTGATGCAAGTGGCCAATACG  
ACCATGTCTAGTAGGAGTCGCAATACTACCGTCGCCGACACATATAACATCACAGACCCGG  
AGGAGTTCGAGACTGAATATCCCTTCTTTGAGAGCAGGGTGGACAATAAGGAAAGAACAGT  
GATCAGCAACCTGCGACCGTTCACACTGTACAGGATCGATATTCCTCCTGTAACCACGAAG  
CCGAGAAGCTGGGCTGCAGTGCAAGTAACTTTGTCTTCGCCCGAACTATGCCCGCAGAGGGT

GCCGACGATATTCCCGGCCCGTTACCTGGGAACCGAGGCCCGAGAACTCTATCTTCTCAA  
ATGGCCAGAGCCCGAGAACCCTAATGGTCTTATCCTGATGTATGAGATCAAGTACGGCAGCC  
AGGTGGAAGACCAGAGAGAATGTGTCTCCAGGCAAGAATACAGGAAGTATGGTGGGGCAA  
AACTGAACCGGTTGAATCCGGGAAATTATACTGCCAGGATCCAAGCCACTTCTCTCAGTGGC  
AATGGGTCTGACAGATCCTGTGTTCTTCTACGTGCCAGCCAAGACAACCTATGAAAACCT  
TATGCACCTCATTATTGCCCTCCCAGTTGCTATCCTCCTTATCGTGGGTGGACTGGTCATCATG  
CTTTATGTCTTTACCCGGAAGCGCAACAATAGTAGACTGGGTAACGGCGTCTGTATGCTAGT  
GTCAATCCGGAGTACTTTTCAGCAGCTGACGTCTACGTGCCTGATGAGTGGGAAGTGGCCCG  
CGAAAAAATCACCATGAACAGAGAAGTGGGCCAGGGCAGCTTTGGAATGGTCTATGAGGGT  
GTCGCTAAAGGAGTCGTGAAGGACGAGCCAGAAACTCGGGTGGCCATTAAGACTGTGAATG  
AAGCCGCTTCTATGAGGGAGAGAATCGAATTTCTCAACGAGGCCAGCGTCATGAAGGAGTT  
CAATTGTACCATGTTGTGCGGCTCCTTGGCGTGGTCAGTCAGGGCCAGCCGACACTTGTAT  
CATGGAGCTGATGACCCGTGGGGACCTCAAGTCTACCTGCGATCTCTCCGACCGGAAGTTG  
AGCAGAACAATCTGGTCTGATACCCCTAGTCTGAGCAAGATGATTGAGATGGCCGGAGA  
AATTGCCGATGGAATGGCCTATCTGAACGCCAACAATTCGTGCATAGGGATCTTGCAGCTC  
GAAATTGCATGGTGGCTGAGGATTTACTGTGAAGATCGGAGACTTTGGCATGACAAGGGAC  
ATCTACGAAACAGACTACTATCGCAAGGGAGGCAAAGGCCTGCTTCCAGTTCGGTGGATGA  
GCCCCGAGTCACTGAAAGATGGTGTCTTACCACCCACTCAGATGTCTGGAGCTTTGGAGTG  
GTCCTGTGGGAAATCGCCACCCTGGCTGAACAGCCATAACCAGGGCTTGTCCAACGAGCAGGT  
TCTGCGATTTCGTATGGAGGGGGGCTCTTGGACAAGCCTGACAACTGCCCCGATATGCTGT  
TCGAACTGATGAGAATGTGCTGGCAATACAACCCCAAGATGCGACCGTCTTTCTGGAGATA  
ATTGGGTCTATCAAGGATGAGATGGAACCCAGCTTCCAGGAGGTGAGCTTCTATTATAGCGA  
GGAAAACAACCTCCCGAGCCAGAGGAAGTGGAGATGGAGCCAGAGAATATGGAGTCAGT  
TCCACTCGACCCTAGCGCCAGCAGTGCCTCACTCCCTCTCCCTGAACGACACAGTGGGCACA  
AGGCAGAGAACGGCCAGGTCCGGGGGTTCTTGTGCTTAGAGCCTCTTTTGATGAGCGGCAG  
CCATATGCACACATGAATGGGGGGAGAGCCAACGAGCGCGCTCTGCCTCTGCCACAGAGCT  
CTACCTGCTGATCCTCGGACACACCGAAGCACGCGCCAACAGTAACGTGTGTGCGCCCACTC  
GGTGGGCGGGGGGGCGGGGAGGGGAGAGCAGGTTGTAAACAATCTATTCA

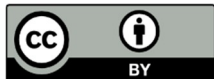

© 2019 by the authors. Licensee MDPI, Basel, Switzerland. This article is an open access article distributed under the terms and conditions of the Creative Commons Attribution (CC BY) license (<http://creativecommons.org/licenses/by/4.0/>).
